# Supplementary material for: A Systematic Review of Qualitative Studies Investigating Motives and Experiences of Recipients of Anonymous Gamete Donation
Source: Front Sociol. 2022 Feb 16;7:746847. doi: 10.3389/fsoc.2022.746847 (PMC8889113; doi:10.3389/fsoc.2022.746847)
Supplement: Supplementary file 1 [file Table2.xlsx]

## Sheet: Reference
Supplementary File S2 | Study characteristics. - Only data that are relevant to the review question are included in the table.
author(s), year of publication	country of study	recruitment / sampling method	participants (sample size, gender, family type)	time of assessment	type of donated gamete	type of donor used	socio-legal / regulatory background concerning donor choice at the time and place of data collection	focus of study	method of data collection	notes
Almack, (2006)	UK	selection of eligible participants from among a larger study's participants (recruited through the author's own and others' personal networks)	13 lesbian couples	post-treatment (age of children: up to 6 years)	sperm	known or identifiable donor (12 recipients), anonymous donor (1 recipient)	no legal restriction of self-insemination; ambivalent formulation of guidelines concerning (anonymous) DI-treatment of lesbian recipients (need for a father)	lesbian couples' reproductive decision-making	interviews (joint and separate interviews which each couple)
Back and Snowden, (1988)	UK	a gynecologist's patients, who had their children through DI over the last four years	57 heterosexual couples	post-treatment (age of children: up to 4 years)	sperm	anonymous donor	only anonymous donations available	recipient parents' experience of donor anonymity	open-ended interviews
Baetens et al. (2000)	Belgium	recipients in an oocyte donation program at a university hospital between 1992 and 1998	144 couples (142 heterosexual, 2 lesbian)	pre-treatment	oocyte	known donor (68.8%), anonymous donor (31.3%, "personalized anonymity")	both known and anonymous donations ("personalized anonymity") available	recipient couples' reproductive choices and underlying motivations, especially concerning donor anonymity and disclosure	semi-structured interviews (pre-treatment counselling)
Bergmann, (2011)	German patients seeking treatment in Spain and the Czech Republic	introduction of participants by the staff of fertility clinics or by attending the physician's consultations in the context of the author's ethnographical fieldwork; call for interviews in an internet forum	3 heterosexual couples (2 couples and 1 mother interviewed)	different stages of treatment	oocyte	anonymous donor	only anonymous donations available (Spain, Czech Republic)	motives, experiences, and reproductive choices of recipients seeking treatment abroad	ethnographic fieldwork (participant observation), in-depth interviews
Bertrand-Servais et al. (1993)	France	recipients of oocyte donation at a clinic in chronological order	50 heterosexual coupled women (and their partners)	mid-treatment	oocyte	anonymous donor ( "personalized anonymity", 45 recipients), non-anonymous donor (5 recipients)	clinic prefers anonymous donation (most couples are aware of this preference)	characterization of recipients (diagnostic and psychological profiles), recipients' relationships to donor and consultant	interviews using pre-set questions in the context of psychological counselling during treatment (after each IVF attempt)	presentation of the same study also published in French (Bertrand-Servais, M., Letur-Könirsch, H., Raoul-Duval, A., and Frydman, R. (1992). Les receveuses de don d'ovocytes dans le cadre de l'anonymat: Aspects psychologiques. J. Gynecol. Obstet. Biol. Reprod. 21 (7), 743–749.)
Blyth et al. (2013)	international (58 respondents from the US, 22 from the UK, and 8 from Australia, among others)	online survey linked from the website and social media of US-based "Donor Sibling Registry" open to both members and non-members	108 parents (68 married heterosexual women, 19 single heterosexual women, among others)	post-treatment (age of children: 1-15 years)	oocyte	anonymous donor (61 recipients), open-identity donor (32 recipients)	study covers various contexts depending on country-specific legislation and clinic or agency policy; 39.8% of the participants had no choice but to use an anonymous donor	perspectives, experiences, and reproductive choices of oocyte recipients and their partners	online survey (including open-ended questions)
Brewaeys et al. (2005)	Netherlands	all participants in a DI-program at a university hospital over one year (to conceive their first child)	105 couples (61% heterosexual, 39% lesbian)	pre-treatment	sperm	anonymous donor (37% of heterosexual couples, 2% of lesbian couples), identity-release donor (63% of heterosexual couples, 98% of lesbian couples)	double track system at the fertility center giving recipients the choice between anonymous and identity-release donors	recipients' donor preferences and motives within a system offering the choice between anonymous and identity-registered donors	interviews (pre-treatment counselling; including open-ended questions)
Brewaeys et al. (1995)	Belgium	participants in a DI-program at a university hospital	50 lesbian couples	post-treatment (age of children: 1-2 years)	sperm	anonymous donor	fertility clinics use only anonymous donors	lesbian couples' attitudes toward donor anonymity, disclosure, parental roles, absence of the father, homosexual parenthood, etc.	standardized interviews
Brewaeys et al. (1993)	Belgium	participants in a DI-program at a university hospital (heterosexual couples selected to sociodemographically match the lesbian couples)	25 lesbian parents, 25 heterosexual parents	post-treatment (age of children: 3 months-7 years)	sperm	anonymous donor	fertility clinics use only anonymous donors	comparison between homosexual and heterosexual parents' attitudes toward DI	interviews (open-ended questions)
Burr, (2009)	UK	announcement through a fertility center and the "Donor Conception Network" (self-selection sampling)	10 heterosexual coupled women, 7 heterosexual couples	post-treatment (age of children: 1-8 years)	sperm	anonymous donor	only anonymous donations available	perceptions and experiences of DI-recipients and their partners regarding the donor and donor anonymity	semi-structured interviews
Chabot and Ames, (2004)	US	announcement at a lesbian mothers' support group and snowball sampling (purposive sampling)	10 lesbian couples	different stages of treatment	sperm	anonymous donor (8 couples), identity-release donor (2 couples)	no legal / regulatory restrictions on donor choice	decision-making process in lesbian couples while creating a family through DI	in-depth, semi-structured interviews, observations of support group meetings	based on the same dataset as Chabot, (1998)
Chabot, (1998)	US	recruitment of eligible participants from a lesbian mothers' support group and through chain sampling	10 lesbian couples	different stages of treatment	sperm	anonymous donor (8 couples), identity-release donor (2 couples)	no legal / regulatory restrictions on donor choice	decisions to be made and issues lesbian couples face while creating a family through DI	in-depth, semi-structured interviews, observations of support group meetings	based on the same dataset as Chabot and Ames, (2004)
Chamouard and Cohen de Lara, (2019)	(French patients treated in) Belgium, Spain, Denmark, and the Netherlands	recruitment and sampling method not reported	12 lesbian couples	post-treatment (7 months pregnancy)	sperm	anonymous donor (8 couples), identity-release donor (4 couples)	DI for female couples not authorized in France	psychological processes among lesbian couples during pregnancy through DI	semi-structured interviews, projective tests
de Melo-Martín et al. (2018)	US	recruitment among recipients at an academic medical center; stratified purposeful sampling to cover diverse demographic backgrounds and experiences	22 heterosexual women (91% partnered)	mid- and post-treatment (age of children: 8 months-15 years)	oocyte	anonymous donor	facility practices anonymous donation	functions of and experiences with anonymity among recipients participating in an anonymous donor program	demographic survey, semi-structured, in-depth interviews
Donovan and Wilson, (2008)	UK	recruitment through personal, professional, and non-heterosexual parenting networks (snowball sampling)	12 lesbian parents	post-treatment (age of children: under 5 years)	sperm	anonymous donor	medicalized DI-treatment conducted with anonymous donations	factors affecting the decision-making process in lesbian couples while creating a family through DI	semi-structured interviews
Frith et al. (2012)	international (80% from the US)	online survey linked from the website of US-based "Donor Sibling Registry," announced on DSR's social media sites, open to members and non-members	244 partners of mothers of donor-conceived children (199 co-mothers/lesbian partners; 45 male partners in heterosexual relationships)	post-treatment	sperm	anonymous donor (67.1%), non-anonymous donor	study covers various contexts based on country-specific legislation, clinic or agency policy; legislative restrictions (e.g., UK), and limited choices because of the sperm banks' policy	experiences and perspectives of non-biological parents of children conceived through DI	online survey (multiple choice questions and free-text comment space)
Gartrell et al. (2015)	US	fifth wave of a longitudinal study	129 lesbian mothers (72 birthmothers, 57 co-mothers)	post-treatment (age of children: 17 years)	sperm	unknown donor (39%), known donor (36.4%), open-identity donor (24.7%)	limited access to sperm banks with open-identity donors reported by some participants	retrospective satisfaction with the type of sperm donor selected and underlying reasons	semi-structured interviews (including open-ended questions, conducted by telephone)
Gartrell et al. (1996)	US	informal networking, word of mouth referrals, announcements at lesbian events, bookstores, in newspapers; efforts to sample racial-ethnic subgroups of the lesbian community by announcements targeting women of color	84 lesbian families (14 prospective single mothers, 70 prospective birthmothers and their co-mothers; 154 lesbian women in total)	mid-treatment	sperm	anonymous donor, known donor	no legal / regulatory restrictions on donor choice reported	parental relationships, social support, motives and preferences concerning pregnancy, stigmatization concerns, and coping strategies of prospective lesbian mothers and their partners	semi-structured interviews (open-ended questions), self-report questionnaires
Graham, (2014)	UK (including participants using CBRS in Denmark and the Czech Republic)	announcement through a fertility clinic, the "Donor Conception Network," and an online infertility community (self-selection sampling)	23 heterosexual single mothers by choice	different stages of treatment	sperm (some cases: double donation sperm+oocyte)	identity-release donor (UK, CBRS), anonymous donor (CBRS)	treatment in the UK only allowed with identity-release donors; CBRS-patients had the choice between anonymous and identity-release donors	perception of the donor and reproductive decisions of single women seeking motherhood through the use of donor sperm	multiple interviews over a one-year period
Greenfeld et al. (1998)	US	consecutive recipients of a donor oocyte program at a university hospital	90 women (88 married)	pre-treatment	oocyte	anonymous donor (64 recipients), known donor (26 recipients)	facility offered both an anonymous and a non-anonymous donor program	demographic and psychological factors of recipients opting for anonymous or known donation; relationship between oocyte recipients' attitudes towards disclosure and choice of donor type	semi-structured interviews (including open-ended questions), psychological assessment
Greenfeld and Klock, (2004)	US	announcement targeting eligible participants through five academic medical centers after chart review	90 women (married or cohabitating)	post-treatment (age of children: 2 months-8 years)	oocyte	anonymous donor (70 recipients), known donor (20 recipients)	no institutional constraints of donor choice reported	comparison of knowledge of the donor and disclosure decisions of known and anonymous oocyte donation recipients	questionnaires (including open-ended questions)
Gross and Richardot, (2019)	France	selection of eligible participants from a larger study on same-sex parenting	82 lesbian couples (questionnaires only), 27 lesbian couples (questionnaires and interviews)	post-treatment	sperm	anonymous donor, identity-release donor, known donor	anonymous, identity-release, and known donation available through DI or private donor recruitment (including recruitment on the Internet)	ways in which conception narratives are formulated and recounted to DI-conceived children by their lesbian parents	questionnaires, semi-directive interviews
Haimes and Weiner, (2000)	UK	authors' personal contacts and snowball sampling	8 lesbian women, 2 lesbian couples	post-treatment (age of children: 6 months-12 years)	sperm	anonymous donor, known donor	recipients' problems of being accepted for treatment at licensed clinics reported	lesbian parents' ways of negotiating their relationships with donors and meeting their children's needs	semi-structured interviews
Harrigan et al. (2017)	international (17 participants from the US, 1 from the UK, and 1 from Canada)	recruitment via purposive, network, and snowball sampling through posts on web forums and online groups	19 parents (coupled and single, heterosexual and lesbian)	post-treatment (age of children: 10 months-29 years)	sperm (15 participants), sperm + oocyte (2 participants)	anonymous donor	no legal / regulatory restrictions on donor choice reported	types of face threats parents of anonymous donor-conceived children anticipate or experience and their preventative and corrective facework strategies	online demographic survey, semi-structured interviews (including open-ended questions)
Haynes, (2003)	UK	not reported	2 lesbian families	post-treatment (age of children: 11 and 16 years)	sperm	known donor, non-identifiable donor	no legal restriction on self-insemination; ambivalent formulation of guidelines concerning (anonymous) DI-treatment of lesbian recipients (need for a father)	lesbian couples' reproductive choices and experiences of DI	interviews
Herrmann-Green and Gehring, (2007)	Germany	recruitment through informal networks, a website, announcement in gay and lesbian magazines, and at counselling and health centers, etc. (self-selection sampling)	105 lesbian women (55 birthmothers, 50 co-mothers)	different stages of treatment	sperm	anonymous donor (44 recipients), known donor (39 recipients), identity-release donor (22 recipients)	guidelines by the German Medical Association impede lesbian couples' access to DI	issues and decisions of lesbian mothers conceiving by DI in the first stage of family formation	questionnaires (including open-ended questions)	based on the same dataset as Herrmann-Green and Herrmann-Green, (2008)
Herrmann-Green and Herrmann-Green, (2008)	Germany	recruitment through informal networks, a website, announcement in gay and lesbian magazines, and at counselling and health centers, etc. (self-selection sampling)	105 lesbian women (55 birthmothers, 50 co-mothers)	different stages of treatment	sperm	anonymous donor (44 recipients), known donor (39 recipients), identity-release donor (22 recipients)	guidelines by the German Medical Association impede lesbian couples' access to DI	issues and decisions of lesbian mothers conceiving by DI in the first stage of family formation	questionnaires (including open-ended questions)	based on the same dataset as Herrmann-Green and Gehring, (2007)
Hershberger, (2007)	US	recruitment of participants at an infertility center (self-selection sampling)	8 heterosexual, married women	post-treatment (in pregnancy)	oocyte	anonymous donor (7 recipients), known donor (1 recipient)	no legal / regulatory restrictions on donor choice	exploring pregnant recipients' overall experience of using donor oocytes	demographic questionnaire, in-depth interviews (open-ended questions)	based on the same dataset as Hershberger, (2005)
Hershberger, (2005)	US	recruitment of participants at an infertility center (self-selection sampling)	8 heterosexual, married women	post-treatment (in pregnancy)	oocyte	anonymous donor (7 recipients), known donor (1 recipient)	no legal / regulatory restrictions on donor choice	exploring pregnant recipients' overall experience of using donor oocytes	demographic questionnaire, in-depth interviews (open-ended questions)	based on the same dataset as Hershberger, (2007)
Hertz and Ferguson, (1997)	US	recruitment through social networks (quota sampling, theoretical sampling)	50 single mothers by choice (44 heterosexual, 6 lesbian)	post-treatment	sperm	anonymous donor, known donor, adoption, accidental pregnancy	no legal / regulatory restrictions on donor choice	choices pertaining to singlehood and motherhood, kinship strategies, and economic self-sufficiency among single mothers by choice	interviews
Jacob et al. (1999)	US	recruitment of participants in the context of pretreatment counselling at a university hospital	23 lesbian couples (control group: 17 single mothers by choice, 14 heterosexual couples)	pre-treatment	sperm	anonymous donor	no legal / regulatory restrictions on donor choice reported; however, the facility presumably used only anonymous donations	comparison of lesbian couples, single women, and heterosexual couples seeking DI with regard to their preferences, attitudes, and concerns	questionnaires (including open-ended questions)
Jadva et al. (2009)	international (73% US, 10% Canada, 8% UK, 9% other)	online questionnaire linked from a website for single mothers by choice and distributed via a newsletter; selection of eligible participants (women who have already had children) among the respondents	291 single mothers by choice (90% heterosexual)	post-treatment	sperm	anonymous donor (60%), known donor (8%), other methods	study covers various contexts based on country-specific legislation, clinic or agency policy; some participants reported that anonymous donation was the only option available because of legislative restrictions (UK) or sperm bank policy	motivations and experiences of single mothers by choice	online survey (multiple choice and open-ended questions)
Kelly, (2012)	Canada	recruitment through a local support group for single mothers by choice	10 single mothers by choice (5 heterosexual, 5 non-heterosexual)	post-treatment (average age of children: 3 years)	sperm	identity-release donor (6 recipients), anonymous donor (2 recipients), known donor (2 recipients)	fertility clinics' cooperation with fixed sperm banks could result in the unavailability of certain donor types	ways in which pre-conception decision-making and post-birth experiences of single mothers by choice were shaped by law	interviews
Kranz and Daniluk, (2006)	Canada	recruitment through word-of-mouth, advertisements, a fertility center (self-selection sampling)	10 lesbian couples	post-treatment (age of children: 1½-6 years)	sperm	anonymous donor (1 couple: potential to obtain identifying information)	no legal / regulatory restrictions on donor choice	lesbian couples' reproductive decision-making and experiences of family formation by DI	semi-structured, in-depth interviews (open-ended questions)	based on the same dataset as Kranz, (2005)
Kranz, (2005)	Canada	recruitment through word-of-mouth, advertisements, a fertility center (self-selection / convenience sampling)	10 lesbian couples	post-treatment (age of children: 1½-6 years)	sperm	anonymous donor (1 couple: potential to obtain identifying information)	no legal / regulatory restrictions on donor choice; identity-release donors were not available at the location of the participants	lesbian couples' reproductive decision-making and experiences of family formation by DI	semi-structured, in-depth interviews (open-ended questions)	based on the same dataset as Kranz and Daniluk, (2006)
Landau and Weissenberg, (2010)	Israel	recipients who utilized sperm donations from a single large sperm bank	62 (formally) single women (18% in a lesbian partnership)	post-treatment (age of children: up to 7 years)	sperm	anonymous donor	national policy of anonymity of sperm donation	disclosure decisions of single mothers and their attitudes toward identifying information on the donor	interviews (semi-constructed open questions), questionnaires (including open-ended questions)
Laruelle et al. (2011)	Belgium	couples applying for treatment with oocyte donation at a university hospital who met the inclusion/exclusion criteria	135 heterosexual couples	pre-treatment	oocyte	known donor (42 recipients), known-anonymous donor (48 recipients), anonymous donor (45 recipients)	facility offered a choice among known, known-anonymous, and anonymous donation	comparison of recipients' motivations toward types of donation (known, anonymous, known-anonymous) and attitudes toward disclosure	semi-structured interviews (data collected during pre-treatment counselling)	presentation of the same study also published in French (Laruelle, C., Place, I., Englert, Y., and Delbaere, A. (2016). Coexistence de deux programmes de don d’ovocyte, don anonyme et don direct: L’expérience de l’hôpital Érasme à Bruxelles. Med. Ther. Med. Reprod. Gynecol. Endocrinol. 18 (2), 91–100.)
Leblond de Brumath and Julien, (2012)	Canada	recruitment through community groups and newspaper advertisements (self-selection sampling)	25 lesbian couples	mid-treatment	sperm	anonymous donor (56%), known donor (44%)	both known and anonymous donations available	contextual factors in lesbian couples' reproductive decisions	questionnaires, semi-structured interviews (including open-ended questions)
Leeb-Lundberg et al. (2006)	Sweden	DI-recipients at a university hospital from 1997 to 2003	16 heterosexual couples	post-treatment (age of children: 1-7 years)	sperm	identity-release donor	only identity-release donations allowed by national law	recipient couples' disclosure intentions and decisions, and their attitudes toward open-identity donation	semi-structured interviews
Marvel, (2013)	Canada	selected by the author from an ongoing larger study on the experiences of LGBTQ people accessing ART	1 lesbian couple	post-treatment	sperm	anonymous donor	no legal / regulatory restrictions on donor choice	concerns of LGBTQ DI-recipients in Canada, especially regarding relevant legislation and regulations	interview
Moget and Heenen-Wolff, (2015)	Belgium	presentation of vignettes from among a larger study's participants (recruited through word-of-mouth; snowball sampling)	2 lesbian families	post-treatment (age of children: 4-9 years)	sperm	anonymous donor	both known and anonymous donations available for DI-treatment	psychological functioning of DI-conceived children raised by lesbian couples; experiences and decisions of recipient couples	interviews
Nordqvist, (2012)	UK	recruitment online (message boards for lesbian parents) and offline (snowballing through personal/organizational networks, social events) (purposive sampling)	25 lesbian couples (45 women)	different stages of treatment	sperm	known donor, anonymous donor	unclear as the age of the children of participants was not reported	lesbian couples' negotiation of parental identities and the role and contribution of donors	semi-structured, in-depth interviews
Ryan-Flood, (2005)	Sweden, Ireland	recruitment through various means (e.g., advertising and LGBT parent networks)	68 lesbian parents (40 in Sweden/24 families, 28 in Ireland/18 families)	post-treatment (1 recipient mid-treatment)	sperm	known donor (34 families), anonymous donor (8 families)	only identity-release donations allowed by national law and restricted access to ART for lesbian couples reported (Sweden); DI not offered to lesbians, despite absence of legislative prohibition (Ireland)	reproductive decision-making and discourses of fatherhood among lesbian women	interviews
Scheib et al. (2000)	US (including recipients from Canada)	recruitment of participants from customer database of a sperm bank (every third eligible recipient requested until final sample size was reached; group I); recruitment of participants from customer-database of a sperm bank (sociodemographically matched to group I)	97 DI-recipients (58 lesbian, 34 heterosexual, 5 bisexual) (group I), 55 DI recipients (group II)	different stages of treatment (including recipients having stopped treatment attempts)	sperm	anonymous donor, identity-release donor	sperm bank offers anonymous and identity-release donations; no restrictions on donor choice reported	criteria recipients use to select their donors, especially with respect to their choice between anonymous and identity-release donors	telephone interviews (open-ended questions) (group I), analysis of actual choices (group II)
Schwartz, (2010)	US	recruitment in a major metropolitan area through online advertisements and distribution of printed notices (snowball sampling); selection of eligible participants (criterion-based sampling)	7 lesbian couples (14 women)	different stages of treatment (pre-treatment to post-treatment; age of children: up to 6 months)	sperm	anonymous donor (5 couples), known donor (2 couples)	no legal / regulatory restrictions on donor choice reported	decision-making process and relational dynamics of lesbian couples planning for conception through DI	demographic questionnaires, semi-structured interviews
Smith, (2005)	Canada	recruitment through word-of-mouth and strategically placed advertisements (snowball and purposive sampling)	10 lesbian women (6 co-mothers, 4 birthmothers)	post-treatment (age of children: 1-20 years)	sperm	known donor, anonymous donor	no legal / regulatory restrictions on donor choice reported	lesbian couples' experiences of secrecy and openness around using DI, and their preferences and experiences with regard to choosing a known or anonymous donor	multi-method (questionnaires, autobiographies, journals, interviews)
Somers et al. (2017)	Belgium	eligible participants selected from among former DI-recipients at a university hospital	9 lesbian couples (18 parents)	post-treatment (age of children: 7-10 years)	sperm	anonymous donor	no legal restrictions on donor choice; however, treatment with anonymous donations is the facility's main policy	decision-making process in lesbian couples while creating a family through DI and negotiations between the biological and non-biological mother	semi-structured, in-depth interviews
Stuart-Smith et al. (2012)	UK (including participants using CBRS in the US and Spain)	recruitment of participants from a waiting list for treatment at a larger fertility clinic and through the "Donor Conception Network" (sample selected to be as homogenous as possible)	11 heterosexual, married women	different stages of treatment	oocyte	anonymous donor	in spite of changes in legislation governing donor identity release, most oocyte recipients only receive a very limited amount of (non-identifying) information about the donor	reasons for choosing an anonymous oocyte donor and recipients' feelings and desires regarding donor information	semi-structured, in-depth interviews
Touroni and Coyle, (2002)	UK	recruitment through announcements in lesbian and gay press and through lesbian parenting support groups etc., and through snowballing	9 lesbian couples	post-treatment (age of children: 6 months-8 years, 1 couple expecting)	sperm	known donor (self-insemination) (66.7%), anonymous donor (33.3%)	no legal / regulatory restrictions on donor choice reported	decision-making in planned lesbian parenting	interviews
Vanfraussen et al. (2001)	Belgium	follow-up study (initial participants in a longitudinal study were invited)	45 lesbian parents (24 families, both couples and separated; 23 birthmothers, 22 co-mothers)	post-treatment (age of children: 7-17 years)	sperm	anonymous donor	only anonymous donations available	comparison between children's and lesbian parents' concepts of the donor and their attitudes toward donor anonymity	in-depth topic interviews
Vaughan, (2007)	US	patients of the author's psychotherapeutic practice (sampling method / selection criteria not reported)	lesbian women / couples (3 clinical vignettes; data on other patients (number not reported)	different stages of treatment	sperm	various	no legal / regulatory restrictions on donor choice reported	psychological meanings of lesbians' reproductive choices	interviews (psychoanalytical and psychotherapeutic counselling)
Wendland et al. (1996)	US	selection of eligible participants from all recipients treated at a university hospital between 1990 and 1993	42 single women, lesbian and heterosexual DI-recipients, 24 partners	different stages of treatment	sperm	anonymous donor	facility practices anonymous donation	comparison of heterosexual and lesbian couples and single women receiving DI in terms of demographic data, preferences and beliefs, social support, etc.	chart review followed by mail questionnaires using multiple-choice and open-ended questions
Wyverkens et al. (2014)	Belgium	selection of eligible participants from all recipients treated at a university hospital between 2002 and 2004; recruitment started with the parents of the eldest children until sample size was reached	10 lesbian couples (20 parents)	post-treatment (age of children: 7-10 years)	sperm	anonymous donor	only anonymous donations available	meanings lesbian couples construct regarding their sperm donor	semi-structured interviews
